# Supplementary material for: The palate and choanae structure of theSusisuchusanatoceps(Crocodyliformes, Eusuchia): phylogenetic implications
Source: PeerJ journal article supplement (doi:10.7717/peerj.5372), 2018-08-10
Supplement: Supplement_2.pdf [file Supplement_2.pdf]

Supplement 2. New character coding (342 characters) of *Susisuchus anatoceps* based on FPH-243-V in addition to the holotype, following data from Turner & Pritchard (2015). Data used in analyzes 2, 3 and 4.

203?1 21101 1?00? 11000 10011 1?001 00010 02010 1011? 11?0? ???10 0???? ?1?0?  
1312? 3?0?1 ?000? 01??? ???1? ?1002 02011 0??0? 000?1 0??00 ?1?10 00??1 111?0  
????0 00012 011?0 ?0000 ???20 ??001 0?001 022?0 1?0?? ?100? 0?0?0 0?0?0 0?01?  
?0010 00?11 10?00 0?0?0 00000 0000? 0?000 0001? 00000 0010? ?0?00 ?1000 00???  
??0?1 1?01? 0?010 00??0 0?0?0 0?0?0 ?0000 0?1?? ??00? 00010 00011 21110 ?0???  
????? ?????? ?????? ??
